# Supplementary material for: Enhanced Immunosuppression of T Cells by Sustained Presentation of Bioactive Interferon‐γ Within Three‐Dimensional Mesenchymal Stem Cell Constructs
Source: PubMed Central journal article supplement (PMC5442746; doi:10.5966/sctm.2016-0044), 2016-08-08
Supplement: SCT3-6-223-s001.pdf [file SCT3-6-223-s001.pdf]

Supplemental Figure – McDevitt et al.

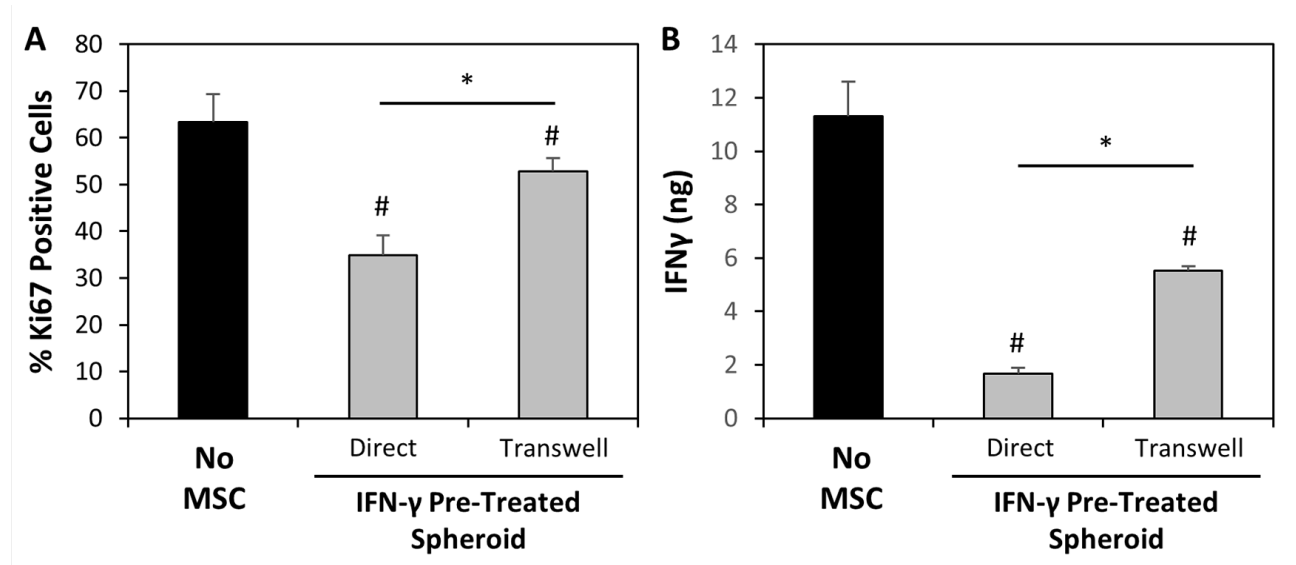

**Figure S1.** Transwell co-culture reduces the ability of spheroid MSCs to suppress T-cell proliferation. (A) Co-culture of CD3/CD28 activated PBMCs with spheroid MSCs in transwell co-culture reduced the ability of MSCs to suppress T-cell proliferation as determined by percentage of Ki67<sup>+</sup> T-cells. (B) Similarly, transwell co-culture reduced the ability of MSCs to suppress T-cell expression of the effector cytokine IFN- $\gamma$ . \* indicates p < 0.05 compared to groups denoted by bars. # indicates p < 0.05 compared to "No MSC" cultures.
